# Supplementary material for: Engineering transferrable microvascular meshes for subcutaneous islet transplantation
Source: PubMed Central journal article supplement (PMC6787187; doi:10.1038/s41467-019-12373-5), 2019-10-10
Supplement: 41467_2019_12373_MOESM7_ESM.pdf [file 41467_2019_12373_MOESM7_ESM.pdf]

## Reporting Summary

Nature Research wishes to improve the reproducibility of the work that we publish. This form provides structure for consistency and transparency in reporting. For further information on Nature Research policies, see [Authors & Referees](#) and the [Editorial Policy Checklist](#).

### Statistics

For all statistical analyses, confirm that the following items are present in the figure legend, table legend, main text, or Methods section.

n/a Confirmed

- |                                     |                                     |                                                                                                                                                                                                                                                            |
|-------------------------------------|-------------------------------------|------------------------------------------------------------------------------------------------------------------------------------------------------------------------------------------------------------------------------------------------------------|
| <input type="checkbox"/>            | <input checked="" type="checkbox"/> | The exact sample size ( $n$ ) for each experimental group/condition, given as a discrete number and unit of measurement                                                                                                                                    |
| <input type="checkbox"/>            | <input checked="" type="checkbox"/> | A statement on whether measurements were taken from distinct samples or whether the same sample was measured repeatedly                                                                                                                                    |
| <input type="checkbox"/>            | <input checked="" type="checkbox"/> | The statistical test(s) used AND whether they are one- or two-sided<br><i>Only common tests should be described solely by name; describe more complex techniques in the Methods section.</i>                                                               |
| <input checked="" type="checkbox"/> | <input type="checkbox"/>            | A description of all covariates tested                                                                                                                                                                                                                     |
| <input type="checkbox"/>            | <input checked="" type="checkbox"/> | A description of any assumptions or corrections, such as tests of normality and adjustment for multiple comparisons                                                                                                                                        |
| <input type="checkbox"/>            | <input checked="" type="checkbox"/> | A full description of the statistical parameters including central tendency (e.g. means) or other basic estimates (e.g. regression coefficient) AND variation (e.g. standard deviation) or associated estimates of uncertainty (e.g. confidence intervals) |
| <input type="checkbox"/>            | <input checked="" type="checkbox"/> | For null hypothesis testing, the test statistic (e.g. $F$ , $t$ , $r$ ) with confidence intervals, effect sizes, degrees of freedom and $P$ value noted<br><i>Give <math>P</math> values as exact values whenever suitable.</i>                            |
| <input checked="" type="checkbox"/> | <input type="checkbox"/>            | For Bayesian analysis, information on the choice of priors and Markov chain Monte Carlo settings                                                                                                                                                           |
| <input checked="" type="checkbox"/> | <input type="checkbox"/>            | For hierarchical and complex designs, identification of the appropriate level for tests and full reporting of outcomes                                                                                                                                     |
| <input checked="" type="checkbox"/> | <input type="checkbox"/>            | Estimates of effect sizes (e.g. Cohen's $d$ , Pearson's $r$ ), indicating how they were calculated                                                                                                                                                         |

*Our web collection on [statistics for biologists](#) contains articles on many of the points above.*

### Software and code

Policy information about [availability of computer code](#)

Data collection EVOS™ FL Imaging System was used to collect optical, phase-contrast and fluorescence images. Confocal images were captured by FV10-ASW2.0 software (Olympus) under FLUOVIEW FV1000 confocal microscope (Olympus)

Data analysis GraphPad Prism and R software were used for data plotting and statistical analysis. Fiji ImageJ software was used for image analysis

For manuscripts utilizing custom algorithms or software that are central to the research but not yet described in published literature, software must be made available to editors/reviewers. We strongly encourage code deposition in a community repository (e.g. GitHub). See the Nature Research [guidelines for submitting code & software](#) for further information.

### Data

Policy information about [availability of data](#)

All manuscripts must include a [data availability statement](#). This statement should provide the following information, where applicable:

- Accession codes, unique identifiers, or web links for publicly available datasets
- A list of figures that have associated raw data
- A description of any restrictions on data availability

All relevant data are available within the article and Supplementary Information, and from the corresponding author upon reasonable request.

### Field-specific reporting

Please select the one below that is the best fit for your research. If you are not sure, read the appropriate sections before making your selection.

- Life sciences       Behavioural & social sciences       Ecological, evolutionary & environmental sciences

## Life sciences study design

All studies must disclose on these points even when the disclosure is negative.

|                 |                                                                                                                                                              |
|-----------------|--------------------------------------------------------------------------------------------------------------------------------------------------------------|
| Sample size     | Sample size was determined based on previous experience and literatures                                                                                      |
| Data exclusions | All mice were used for analysis unless they died or had to be euthanized according to IACUC approved protocols.                                              |
| Replication     | Experiments were repeated at least twice. Results were consistent across independent experiments                                                             |
| Randomization   | Mice were randomized among control and treatment groups to keep blood glucose levels at the similar level for all groups at the beginning of transplantation |
| Blinding        | Blood glucose measurements were randomly performed by blinded and non-blinded personnel                                                                      |

## Reporting for specific materials, systems and methods

We require information from authors about some types of materials, experimental systems and methods used in many studies. Here, indicate whether each material, system or method listed is relevant to your study. If you are not sure if a list item applies to your research, read the appropriate section before selecting a response.

### Materials & experimental systems

| n/a                                 | Involvement in the study                                        |
|-------------------------------------|-----------------------------------------------------------------|
| <input type="checkbox"/>            | <input checked="" type="checkbox"/> Antibodies                  |
| <input type="checkbox"/>            | <input checked="" type="checkbox"/> Eukaryotic cell lines       |
| <input checked="" type="checkbox"/> | <input type="checkbox"/> Palaeontology                          |
| <input type="checkbox"/>            | <input checked="" type="checkbox"/> Animals and other organisms |
| <input checked="" type="checkbox"/> | <input type="checkbox"/> Human research participants            |
| <input checked="" type="checkbox"/> | <input type="checkbox"/> Clinical data                          |

### Methods

| n/a                                 | Involvement in the study                        |
|-------------------------------------|-------------------------------------------------|
| <input checked="" type="checkbox"/> | <input type="checkbox"/> ChIP-seq               |
| <input checked="" type="checkbox"/> | <input type="checkbox"/> Flow cytometry         |
| <input checked="" type="checkbox"/> | <input type="checkbox"/> MRI-based neuroimaging |

## Antibodies

### Antibodies used

Mouse anti-human CD31 (PECAM-1), eBioscience, Cat No 14-0319-82, Clone WM-59  
 Rabbit anti-human CD31, Sigma, Cat No SAB5600061-100UL, Clone RM247  
 Goat anti-mouse CD31, R&D systems, Cat No AF3628  
 Alfa-smooth muscle actin antibody conjugated with Cy3, Sigma, Cat No C6198-.2ML, Clone 1A4  
 Rabbit anti-rat insulin, abcam, Cat No ab181547, Clone EPR17359  
 Alexa Fluor™ 488 goat anti-mouse antibody, Invitrogen, Cat No A-11001  
 Alexa Fluor™ 555 donkey anti-mouse antibody, Invitrogen, Cat No A-31570  
 Alexa Fluor™ 488 phalloidin, Life technology, Cat No A12379  
 Texas Red™-X Phalloidin, Life technology, Cat No T7471  
 Alexa Fluor™ 594 donkey anti-rabbit antibody, Invitrogen, Cat No R37119  
 Alexa Fluor™ 488 donkey anti-rabbit antibody, Invitrogen, Cat No R37118  
 Alexa Fluor™ 488 donkey anti-goat antibody, Invitrogen, Cat No A-11055  
 Alexa Fluor™ 594 donkey anti-rabbit antibody, Invitrogen, Cat No R37119

### Validation

Mouse anti-human CD31 (PECAM-1), eBioscience, Cat No 14-0319-82, Clone WM-59:  
 The WM59 monoclonal antibody reacts with human CD31  
<https://www.thermofisher.com/antibody/product/CD31-PECAM-1-Antibody-clone-WM-59-WM59-Monoclonal/14-0319-82>

Rabbit anti-human CD31, Sigma, Cat No SAB5600061-100UL, Clone RM247  
 This antibody reacts to human CD31 (Platelet endothelial cell adhesion molecule, PECAM-1)  
<https://www.sigmaaldrich.com/catalog/product/sigma/sab5600061?lang=en&region=US>

Goat anti-mouse CD31, R&D systems, Cat No AF3628  
 Detects mouse and rat CD31/PECAM-1, approximately 10% cross-reactivity with recombinant human CD31 and recombinant porcine CD31 is observed  
[https://www.rndsystems.com/products/mouse-rat-cd31-pecam-1-antibody\\_af3628](https://www.rndsystems.com/products/mouse-rat-cd31-pecam-1-antibody_af3628)

Alfa-smooth muscle actin antibody conjugated with Cy3, Sigma, Cat No C6198-.2ML, Clone 1A4  
 Species reactivity: human, mouse, rat, rabbit, guinea pig, chicken, snake, sheep, goat, frog, canine, bovine  
 Application: immunohistochemistry (formalin-fixed, paraffin-embedded sections)  
<https://www.sigmaaldrich.com/catalog/product/sigma/c6198?lang=en&region=US>

Rabbit anti-rat insulin, abcam, Cat No ab181547, Clone EPR17359  
 Species reactivity: Mouse, Rat, Human  
 Tested applications, Suitable for: IHC-FoFr, WB, IHC-P, ICC/IF  
<https://www.abcam.com/insulin-antibody-epr17359-ab181547.html>

## Eukaryotic cell lines

Policy information about [cell lines](#)

|                                                                      |                                                                                                            |
|----------------------------------------------------------------------|------------------------------------------------------------------------------------------------------------|
| Cell line source(s)                                                  | HUVEC and NHDF were purchased from Lonza                                                                   |
| Authentication                                                       | Lonza's certificate                                                                                        |
| Mycoplasma contamination                                             | Cells were not tested for mycoplasma contamination in house but Lonza certified them free of contamination |
| Commonly misidentified lines<br>(See <a href="#">ICLAC</a> register) | Neither of cell lines are on the ICLAC registry                                                            |

## Animals and other organisms

Policy information about [studies involving animals](#); [ARRIVE guidelines](#) recommended for reporting animal research

|                         |                                                                                                                                                                                                                                                                                |
|-------------------------|--------------------------------------------------------------------------------------------------------------------------------------------------------------------------------------------------------------------------------------------------------------------------------|
| Laboratory animals      | Sprague-Dawley rats (male, strain code 400, 250-275 g weight, Charles River)<br>SD-Tg(UBC-EGFP)2BalRrc rats (or SD-EGFP, male, 8-12 weeks old, Rat Resource and Research Center)<br>SCID-Beige mice (male and female, model number CBSCBG, 6-8 weeks old, Taconic Biosciences) |
| Wild animals            | The study didn't involve wild animals                                                                                                                                                                                                                                          |
| Field-collected samples | The study did not involve samples collected from the field                                                                                                                                                                                                                     |
| Ethics oversight        | All animal procedures were approved by and performed according to the guidelines of the Institutional Animal Care and Use Committee at the Cornell University                                                                                                                  |

Note that full information on the approval of the study protocol must also be provided in the manuscript.
